# Supplementary material
Source: MDPI journal article supplement (https://www.mdpi.com/2079-6412/13/10/1686)
Supplement: s1 [file s1]

Archive with 1 entries (1 files):
- coatings-2597096-supplementary.pdf
